# Supplementary material for: The total synthesis of hyperpapuanone, hyperibone L, epi-clusianone and oblongifolin A
Source: Springer Nature journal article supplement (doi:10.1038/nchem.1170), 2011-10-14
Supplement: 41557_2011_BFnchem1170_MOESM53_ESM.cif [file 41557_2011_BFnchem1170_MOESM53_ESM.cif]

 
data_s1634rc 
 
_audit_creation_method            SHELXL-97 
_chemical_name_systematic 
; 
 ? 
; 
_chemical_name_common             ? 
_chemical_melting_point           ? 
_chemical_formula_moiety          ? 
_chemical_formula_sum 
 'C30 H38 O4' 
_chemical_formula_weight          462.60 
 
loop_ 
 _atom_type_symbol 
 _atom_type_description 
 _atom_type_scat_dispersion_real 
 _atom_type_scat_dispersion_imag 
 _atom_type_scat_source 
 'C'  'C'   0.0181   0.0091 
 'International Tables Vol C Tables 4.2.6.8 and 6.1.1.4' 
 'H'  'H'   0.0000   0.0000 
 'International Tables Vol C Tables 4.2.6.8 and 6.1.1.4' 
 'O'  'O'   0.0492   0.0322 
 'International Tables Vol C Tables 4.2.6.8 and 6.1.1.4' 
 
_symmetry_cell_setting            ? 
_symmetry_space_group_name_H-M    ? 
 
loop_ 
 _symmetry_equiv_pos_as_xyz 
 'x, y, z' 
 '-x, y+1/2, -z+1/2' 
 '-x, -y, -z' 
 'x, -y-1/2, z-1/2' 
 
_cell_length_a                    14.2028(18) 
_cell_length_b                    8.4774(9) 
_cell_length_c                    22.6154(16) 
_cell_angle_alpha                 90.00 
_cell_angle_beta                  107.307(8) 
_cell_angle_gamma                 90.00 
_cell_volume                      2599.7(5) 
_cell_formula_units_Z             4 
_cell_measurement_temperature     293(2) 
_cell_measurement_reflns_used     ? 
_cell_measurement_theta_min       ? 
_cell_measurement_theta_max       ? 
 
_exptl_crystal_description        ? 
_exptl_crystal_colour             ? 
_exptl_crystal_size_max           ? 
_exptl_crystal_size_mid           ? 
_exptl_crystal_size_min           ? 
_exptl_crystal_density_meas       ? 
_exptl_crystal_density_diffrn     1.182 
_exptl_crystal_density_method     'not measured' 
_exptl_crystal_F_000              1000 
_exptl_absorpt_coefficient_mu     0.606 
_exptl_absorpt_correction_type    ? 
_exptl_absorpt_correction_T_min   ? 
_exptl_absorpt_correction_T_max   ? 
_exptl_absorpt_process_details    ? 
 
_exptl_special_details 
; 
 ? 
; 
 
_diffrn_ambient_temperature       293(2) 
_diffrn_radiation_wavelength      1.54178 
_diffrn_radiation_type            CuK\a 
_diffrn_radiation_source          'fine-focus sealed tube' 
_diffrn_radiation_monochromator   graphite 
_diffrn_measurement_device_type   ? 
_diffrn_measurement_method        ? 
_diffrn_detector_area_resol_mean  ? 
_diffrn_standards_number          ? 
_diffrn_standards_interval_count  ? 
_diffrn_standards_interval_time   ? 
_diffrn_standards_decay_%         ? 
_diffrn_reflns_number             4664 
_diffrn_reflns_av_R_equivalents   0.0489 
_diffrn_reflns_av_sigmaI/netI     0.0466 
_diffrn_reflns_limit_h_min        0 
_diffrn_reflns_limit_h_max        15 
_diffrn_reflns_limit_k_min        -10 
_diffrn_reflns_limit_k_max        0 
_diffrn_reflns_limit_l_min        -27 
_diffrn_reflns_limit_l_max        25 
_diffrn_reflns_theta_min          3.26 
_diffrn_reflns_theta_max          67.50 
_reflns_number_total              4465 
_reflns_number_gt                 2410 
_reflns_threshold_expression      >2sigma(I) 
 
_computing_data_collection        ? 
_computing_cell_refinement        ? 
_computing_data_reduction         ? 
_computing_structure_solution     'SHELXS-97 (Sheldrick, 1990)' 
_computing_structure_refinement   'SHELXL-97 (Sheldrick, 1997)' 
_computing_molecular_graphics     ? 
_computing_publication_material   ? 
 
_refine_special_details 
; 
 Refinement of F^2^ against ALL reflections.  The weighted R-factor wR and 
 goodness of fit S are based on F^2^, conventional R-factors R are based 
 on F, with F set to zero for negative F^2^. The threshold expression of 
 F^2^ > 2sigma(F^2^) is used only for calculating R-factors(gt) etc. and is 
 not relevant to the choice of reflections for refinement.  R-factors based 
 on F^2^ are statistically about twice as large as those based on F, and R- 
 factors based on ALL data will be even larger. 
; 
 
_refine_ls_structure_factor_coef  Fsqd  
_refine_ls_matrix_type            full 
_refine_ls_weighting_scheme       calc  
_refine_ls_weighting_details 
 'calc w=1/[\s^2^(Fo^2^)+(0.0126P)^2^+7.4367P] where P=(Fo^2^+2Fc^2^)/3' 
_atom_sites_solution_primary      direct 
_atom_sites_solution_secondary    difmap 
_atom_sites_solution_hydrogens    geom 
_refine_ls_hydrogen_treatment     mixed 
_refine_ls_extinction_method      SHELXL 
_refine_ls_extinction_coef        0.0088(3) 
_refine_ls_extinction_expression 
 'Fc^*^=kFc[1+0.001xFc^2^\l^3^/sin(2\q)]^-1/4^' 
_refine_ls_number_reflns          4465 
_refine_ls_number_parameters      345 
_refine_ls_number_restraints      19 
_refine_ls_R_factor_all           0.1633 
_refine_ls_R_factor_gt            0.0844 
_refine_ls_wR_factor_ref          0.2036 
_refine_ls_wR_factor_gt           0.1543 
_refine_ls_goodness_of_fit_ref    1.031 
_refine_ls_restrained_S_all       1.030 
_refine_ls_shift/su_max           0.001 
_refine_ls_shift/su_mean          0.000 
 
loop_ 
 _atom_site_label 
 _atom_site_type_symbol 
 _atom_site_fract_x 
 _atom_site_fract_y 
 _atom_site_fract_z 
 _atom_site_U_iso_or_equiv 
 _atom_site_adp_type 
 _atom_site_occupancy 
 _atom_site_symmetry_multiplicity 
 _atom_site_calc_flag 
 _atom_site_refinement_flags 
 _atom_site_disorder_assembly 
 _atom_site_disorder_group 
O1 O 0.0444(2) 0.0389(4) 0.13748(16) 0.0743(9) Uani 1 1 d . . . 
C1 C 0.1219(3) -0.0213(5) 0.13610(17) 0.0522(10) Uani 1 1 d . . . 
O2 O 0.2050(2) -0.4235(3) 0.14001(15) 0.0716(9) Uani 1 1 d . . . 
C2 C 0.2199(3) 0.0625(4) 0.16057(17) 0.0502(9) Uani 1 1 d . . . 
O3 O 0.3553(2) 0.0292(3) 0.24997(12) 0.0637(8) Uani 1 1 d . . . 
C3 C 0.2590(3) 0.1002(5) 0.10318(18) 0.0576(10) Uani 1 1 d . . . 
O4 O 0.4248(2) -0.3538(5) 0.23444(17) 0.0883(11) Uani 1 1 d . . . 
C4 C 0.2609(3) -0.0492(6) 0.06300(19) 0.0625(11) Uani 1 1 d . B . 
H4 H 0.2604 -0.0071 0.0225 0.075 Uiso 1 1 calc R . . 
C5 C 0.1645(3) -0.1422(6) 0.05005(18) 0.0624(11) Uani 1 1 d . . . 
H5A H 0.1732 -0.2421 0.0314 0.075 Uiso 1 1 calc R . . 
H5B H 0.1137 -0.0843 0.0196 0.075 Uiso 1 1 calc R . . 
C6 C 0.1265(3) -0.1767(5) 0.10578(18) 0.0534(10) Uani 1 1 d . . . 
C7 C 0.2021(3) -0.2805(5) 0.14979(18) 0.0539(10) Uani 1 1 d . . . 
C8 C 0.2751(3) -0.2119(5) 0.20377(17) 0.0505(9) Uani 1 1 d . . . 
C9 C 0.2868(3) -0.0522(5) 0.20673(17) 0.0499(9) Uani 1 1 d . . . 
C10 C 0.4198(4) -0.0458(6) 0.3038(2) 0.0785(15) Uani 1 1 d . . . 
H10A H 0.3819 -0.1117 0.3227 0.118 Uiso 1 1 calc R . . 
H10B H 0.4536 0.0331 0.3328 0.118 Uiso 1 1 calc R . . 
H10C H 0.4671 -0.1092 0.2918 0.118 Uiso 1 1 calc R . . 
C11 C 0.2062(4) 0.2124(5) 0.1962(2) 0.0679(12) Uani 1 1 d . . . 
H11A H 0.1502 0.2707 0.1717 0.102 Uiso 1 1 calc R . . 
H11B H 0.2642 0.2769 0.2043 0.102 Uiso 1 1 calc R . . 
H11C H 0.1957 0.1826 0.2347 0.102 Uiso 1 1 calc R . . 
C12 C 0.3609(3) 0.1806(6) 0.1251(2) 0.0773(14) Uani 1 1 d . . . 
H12A H 0.3861 0.1945 0.0905 0.116 Uiso 1 1 calc R . . 
H12B H 0.4055 0.1157 0.1557 0.116 Uiso 1 1 calc R . . 
H12C H 0.3547 0.2816 0.1428 0.116 Uiso 1 1 calc R . . 
C13 C 0.1869(4) 0.2193(6) 0.0616(2) 0.0747(14) Uani 1 1 d . . . 
H13A H 0.1891 0.3167 0.0835 0.112 Uiso 1 1 calc R . . 
H13B H 0.1211 0.1773 0.0506 0.112 Uiso 1 1 calc R . . 
H13C H 0.2054 0.2378 0.0247 0.112 Uiso 1 1 calc R . . 
C14 C 0.3544(3) -0.1525(6) 0.0832(2) 0.0731(13) Uani 1 1 d . . . 
H14A H 0.4093 -0.0920 0.0780 0.088 Uiso 1 1 calc R A 1 
H14B H 0.3686 -0.1753 0.1271 0.088 Uiso 1 1 calc R A 1 
C16 C 0.3730(4) -0.3291(6) -0.0023(2) 0.0698(13) Uani 1 1 d D . . 
C15 C 0.3488(5) -0.3098(7) 0.0483(3) 0.0607(15) Uani 0.75 1 d P B 1 
H15 H 0.3264 -0.3978 0.0646 0.073 Uiso 0.75 1 calc PR B 1 
C17 C 0.4160(6) -0.2060(9) -0.0339(3) 0.089(2) Uani 0.75 1 d P B 1 
H17A H 0.4304 -0.1130 -0.0086 0.134 Uiso 0.75 1 calc PR B 1 
H17B H 0.3697 -0.1807 -0.0732 0.134 Uiso 0.75 1 calc PR B 1 
H17C H 0.4757 -0.2454 -0.0402 0.134 Uiso 0.75 1 calc PR B 1 
C18 C 0.3591(6) -0.4910(9) -0.0350(4) 0.089(2) Uani 0.75 1 d P B 1 
H18A H 0.3396 -0.5676 -0.0097 0.133 Uiso 0.75 1 calc PR B 1 
H18B H 0.4201 -0.5230 -0.0415 0.133 Uiso 0.75 1 calc PR B 1 
H18C H 0.3091 -0.4829 -0.0743 0.133 Uiso 0.75 1 calc PR B 1 
C15A C 0.372(2) -0.183(5) 0.0216(16) 0.142(11) Uani 0.25 1 d PU B 2 
H15A H 0.3822 -0.0968 -0.0012 0.171 Uiso 0.25 1 calc PR B 2 
C17A C 0.378(3) -0.368(5) -0.0654(9) 0.169(14) Uani 0.25 1 d PDU B 2 
H17D H 0.3172 -0.4187 -0.0884 0.253 Uiso 0.25 1 calc PR B 2 
H17E H 0.4318 -0.4386 -0.0623 0.253 Uiso 0.25 1 calc PR B 2 
H17F H 0.3865 -0.2735 -0.0862 0.253 Uiso 0.25 1 calc PR B 2 
C18A C 0.358(3) -0.464(4) 0.0400(14) 0.142(11) Uani 0.25 1 d PU B 2 
H18D H 0.4159 -0.4755 0.0746 0.214 Uiso 0.25 1 calc PR B 2 
H18E H 0.3447 -0.5605 0.0170 0.214 Uiso 0.25 1 calc PR B 2 
H18F H 0.3026 -0.4390 0.0549 0.214 Uiso 0.25 1 calc PR B 2 
C19 C 0.0266(3) -0.2609(6) 0.08402(19) 0.0652(12) Uani 1 1 d . . . 
H19A H -0.0225 -0.1874 0.0603 0.078 Uiso 1 1 calc R . . 
H19B H 0.0312 -0.3469 0.0567 0.078 Uiso 1 1 calc R . . 
C20 C -0.0073(3) -0.3254(5) 0.1361(2) 0.0664(12) Uani 1 1 d . . . 
H20 H 0.0002 -0.2589 0.1699 0.080 Uiso 1 1 calc R . . 
C21 C -0.0464(3) -0.4647(6) 0.1399(2) 0.0697(12) Uani 1 1 d . . . 
C22 C -0.0668(4) -0.5842(6) 0.0890(3) 0.0965(18) Uani 1 1 d . . . 
H22A H -0.0551 -0.5381 0.0530 0.145 Uiso 1 1 calc R . . 
H22B H -0.1343 -0.6177 0.0790 0.145 Uiso 1 1 calc R . . 
H22C H -0.0242 -0.6735 0.1023 0.145 Uiso 1 1 calc R . . 
C23 C -0.0741(5) -0.5129(8) 0.1956(3) 0.108(2) Uani 1 1 d . . . 
H23A H -0.0524 -0.4341 0.2272 0.162 Uiso 1 1 calc R . . 
H23B H -0.0433 -0.6118 0.2106 0.162 Uiso 1 1 calc R . . 
H23C H -0.1444 -0.5240 0.1850 0.162 Uiso 1 1 calc R . . 
C24 C 0.3442(3) -0.3336(5) 0.24218(19) 0.0579(10) Uani 1 1 d . . . 
C25 C 0.3103(3) -0.4299(5) 0.28611(18) 0.0562(10) Uani 1 1 d . . . 
C26 C 0.3721(4) -0.5503(5) 0.3187(2) 0.0685(12) Uani 1 1 d . . . 
H26 H 0.4326 -0.5693 0.3121 0.082 Uiso 1 1 calc R . . 
C27 C 0.3418(5) -0.6410(6) 0.3613(2) 0.0879(17) Uani 1 1 d . . . 
H27 H 0.3834 -0.7189 0.3837 0.105 Uiso 1 1 calc R . . 
C28 C 0.2529(5) -0.6176(7) 0.3704(3) 0.0927(17) Uani 1 1 d . . . 
H28 H 0.2337 -0.6796 0.3987 0.111 Uiso 1 1 calc R . . 
C29 C 0.1911(4) -0.5022(7) 0.3377(3) 0.0915(17) Uani 1 1 d . . . 
H29 H 0.1299 -0.4859 0.3437 0.110 Uiso 1 1 calc R . . 
C30 C 0.2207(4) -0.4098(6) 0.2957(2) 0.0711(13) Uani 1 1 d . . . 
H30 H 0.1783 -0.3324 0.2735 0.085 Uiso 1 1 calc R . . 
 
loop_ 
 _atom_site_aniso_label 
 _atom_site_aniso_U_11 
 _atom_site_aniso_U_22 
 _atom_site_aniso_U_33 
 _atom_site_aniso_U_23 
 _atom_site_aniso_U_13 
 _atom_site_aniso_U_12 
O1 0.058(2) 0.068(2) 0.097(2) -0.0022(17) 0.0222(17) 0.0053(16) 
C1 0.048(2) 0.056(2) 0.051(2) 0.0005(18) 0.0113(17) -0.0017(19) 
O2 0.084(2) 0.0497(17) 0.079(2) -0.0089(15) 0.0207(17) -0.0004(15) 
C2 0.053(2) 0.048(2) 0.0442(19) -0.0020(16) 0.0051(16) -0.0030(17) 
O3 0.0618(18) 0.0614(18) 0.0547(16) 0.0002(13) -0.0029(13) -0.0105(14) 
C3 0.060(3) 0.059(2) 0.050(2) 0.0027(19) 0.0106(18) -0.009(2) 
O4 0.065(2) 0.109(3) 0.099(3) 0.027(2) 0.0364(19) 0.025(2) 
C4 0.061(3) 0.075(3) 0.052(2) -0.004(2) 0.0181(19) -0.004(2) 
C5 0.062(3) 0.078(3) 0.045(2) -0.007(2) 0.0132(19) -0.004(2) 
C6 0.051(2) 0.055(2) 0.051(2) -0.0052(18) 0.0096(17) -0.0079(18) 
C7 0.051(2) 0.054(2) 0.056(2) -0.0019(19) 0.0148(18) -0.0027(18) 
C8 0.049(2) 0.056(2) 0.0450(19) 0.0024(17) 0.0112(16) 0.0075(18) 
C9 0.048(2) 0.050(2) 0.049(2) -0.0028(17) 0.0105(17) 0.0003(17) 
C10 0.072(3) 0.088(4) 0.055(3) 0.006(2) -0.013(2) -0.007(3) 
C11 0.079(3) 0.047(2) 0.073(3) -0.004(2) 0.016(2) 0.003(2) 
C12 0.069(3) 0.084(3) 0.076(3) 0.004(3) 0.018(2) -0.021(3) 
C13 0.087(3) 0.065(3) 0.062(3) 0.017(2) 0.005(2) -0.005(3) 
C14 0.064(3) 0.098(4) 0.061(3) -0.008(3) 0.024(2) -0.002(3) 
C16 0.071(3) 0.075(3) 0.064(3) 0.002(2) 0.020(2) 0.007(2) 
C15 0.072(4) 0.050(3) 0.071(4) 0.002(3) 0.038(3) -0.001(3) 
C17 0.120(6) 0.092(5) 0.072(4) 0.016(4) 0.053(4) 0.013(5) 
C18 0.100(6) 0.079(5) 0.088(5) -0.028(4) 0.028(4) -0.002(4) 
C15A 0.14(2) 0.16(2) 0.14(2) 0.011(18) 0.062(17) 0.013(17) 
C17A 0.18(2) 0.18(2) 0.16(2) -0.01(2) 0.072(19) 0.03(2) 
C18A 0.16(2) 0.15(2) 0.119(18) 0.032(16) 0.034(16) -0.021(17) 
C19 0.056(3) 0.074(3) 0.060(2) -0.012(2) 0.008(2) -0.016(2) 
C20 0.070(3) 0.063(3) 0.067(3) -0.015(2) 0.020(2) -0.018(2) 
C21 0.058(3) 0.073(3) 0.078(3) -0.008(2) 0.020(2) -0.009(2) 
C22 0.106(4) 0.070(3) 0.115(5) -0.027(3) 0.034(4) -0.022(3) 
C23 0.109(5) 0.122(5) 0.104(4) 0.001(4) 0.050(4) -0.035(4) 
C24 0.052(3) 0.062(3) 0.058(2) 0.006(2) 0.0135(19) 0.007(2) 
C25 0.057(3) 0.057(2) 0.052(2) 0.0053(18) 0.0119(18) 0.0039(19) 
C26 0.071(3) 0.065(3) 0.060(3) 0.000(2) 0.004(2) 0.005(2) 
C27 0.111(5) 0.069(3) 0.069(3) 0.014(3) 0.005(3) -0.003(3) 
C28 0.103(5) 0.089(4) 0.083(4) 0.016(3) 0.025(3) -0.018(4) 
C29 0.084(4) 0.109(5) 0.093(4) 0.013(4) 0.044(3) -0.004(3) 
C30 0.067(3) 0.079(3) 0.068(3) 0.010(2) 0.021(2) 0.009(2) 
 
_geom_special_details 
; 
 All esds (except the esd in the dihedral angle between two l.s. planes) 
 are estimated using the full covariance matrix.  The cell esds are taken 
 into account individually in the estimation of esds in distances, angles 
 and torsion angles; correlations between esds in cell parameters are only 
 used when they are defined by crystal symmetry.  An approximate (isotropic) 
 treatment of cell esds is used for estimating esds involving l.s. planes. 
; 
 
loop_ 
 _geom_bond_atom_site_label_1 
 _geom_bond_atom_site_label_2 
 _geom_bond_distance 
 _geom_bond_site_symmetry_2 
 _geom_bond_publ_flag 
O1 C1 1.222(5) . ? 
C1 C6 1.496(5) . ? 
C1 C2 1.513(5) . ? 
O2 C7 1.235(5) . ? 
C2 C9 1.533(5) . ? 
C2 C11 1.547(5) . ? 
C2 C3 1.589(5) . ? 
O3 C9 1.346(4) . ? 
O3 C10 1.436(5) . ? 
C3 C13 1.542(6) . ? 
C3 C12 1.543(6) . ? 
C3 C4 1.564(6) . ? 
O4 C24 1.221(5) . ? 
C4 C5 1.531(6) . ? 
C4 C14 1.542(6) . ? 
C4 H4 0.9800 . ? 
C5 C6 1.539(5) . ? 
C5 H5A 0.9700 . ? 
C5 H5B 0.9700 . ? 
C6 C7 1.510(5) . ? 
C6 C19 1.533(5) . ? 
C7 C8 1.466(5) . ? 
C8 C9 1.363(5) . ? 
C8 C24 1.508(5) . ? 
C10 H10A 0.9600 . ? 
C10 H10B 0.9600 . ? 
C10 H10C 0.9600 . ? 
C11 H11A 0.9600 . ? 
C11 H11B 0.9600 . ? 
C11 H11C 0.9600 . ? 
C12 H12A 0.9600 . ? 
C12 H12B 0.9600 . ? 
C12 H12C 0.9600 . ? 
C13 H13A 0.9600 . ? 
C13 H13B 0.9600 . ? 
C13 H13C 0.9600 . ? 
C14 C15A 1.51(3) . ? 
C14 C15 1.540(7) . ? 
C14 H14A 0.9700 . ? 
C14 H14B 0.9700 . ? 
C16 C15 1.298(7) . ? 
C16 C15A 1.35(4) . ? 
C16 C17A 1.486(10) . ? 
C16 C17 1.495(8) . ? 
C16 C18 1.544(8) . ? 
C16 C18A 1.55(3) . ? 
C15 H15 0.9300 . ? 
C17 H17A 0.9600 . ? 
C17 H17B 0.9600 . ? 
C17 H17C 0.9600 . ? 
C18 H18A 0.9600 . ? 
C18 H18B 0.9600 . ? 
C18 H18C 0.9600 . ? 
C15A H15A 0.9300 . ? 
C17A H17D 0.9600 . ? 
C17A H17E 0.9600 . ? 
C17A H17F 0.9600 . ? 
C18A H18D 0.9600 . ? 
C18A H18E 0.9600 . ? 
C18A H18F 0.9600 . ? 
C19 C20 1.502(6) . ? 
C19 H19A 0.9700 . ? 
C19 H19B 0.9700 . ? 
C20 C21 1.318(6) . ? 
C20 H20 0.9300 . ? 
C21 C23 1.483(7) . ? 
C21 C22 1.496(7) . ? 
C22 H22A 0.9600 . ? 
C22 H22B 0.9600 . ? 
C22 H22C 0.9600 . ? 
C23 H23A 0.9600 . ? 
C23 H23B 0.9600 . ? 
C23 H23C 0.9600 . ? 
C24 C25 1.473(6) . ? 
C25 C30 1.365(6) . ? 
C25 C26 1.403(6) . ? 
C26 C27 1.396(7) . ? 
C26 H26 0.9300 . ? 
C27 C28 1.353(8) . ? 
C27 H27 0.9300 . ? 
C28 C29 1.374(8) . ? 
C28 H28 0.9300 . ? 
C29 C30 1.390(7) . ? 
C29 H29 0.9300 . ? 
C30 H30 0.9300 . ? 
 
loop_ 
 _geom_angle_atom_site_label_1 
 _geom_angle_atom_site_label_2 
 _geom_angle_atom_site_label_3 
 _geom_angle 
 _geom_angle_site_symmetry_1 
 _geom_angle_site_symmetry_3 
 _geom_angle_publ_flag 
O1 C1 C6 122.8(4) . . ? 
O1 C1 C2 122.2(4) . . ? 
C6 C1 C2 114.8(3) . . ? 
C1 C2 C9 105.5(3) . . ? 
C1 C2 C11 109.4(3) . . ? 
C9 C2 C11 108.4(3) . . ? 
C1 C2 C3 107.6(3) . . ? 
C9 C2 C3 112.8(3) . . ? 
C11 C2 C3 112.9(3) . . ? 
C9 O3 C10 122.0(3) . . ? 
C13 C3 C12 107.2(4) . . ? 
C13 C3 C4 107.4(3) . . ? 
C12 C3 C4 111.5(4) . . ? 
C13 C3 C2 107.5(4) . . ? 
C12 C3 C2 110.4(3) . . ? 
C4 C3 C2 112.5(3) . . ? 
C5 C4 C14 114.0(4) . . ? 
C5 C4 C3 111.0(4) . . ? 
C14 C4 C3 116.8(4) . . ? 
C5 C4 H4 104.5 . . ? 
C14 C4 H4 104.5 . . ? 
C3 C4 H4 104.5 . . ? 
C4 C5 C6 116.9(3) . . ? 
C4 C5 H5A 108.1 . . ? 
C6 C5 H5A 108.1 . . ? 
C4 C5 H5B 108.1 . . ? 
C6 C5 H5B 108.1 . . ? 
H5A C5 H5B 107.3 . . ? 
C1 C6 C7 109.3(3) . . ? 
C1 C6 C19 113.2(4) . . ? 
C7 C6 C19 110.4(3) . . ? 
C1 C6 C5 106.4(3) . . ? 
C7 C6 C5 107.3(3) . . ? 
C19 C6 C5 110.0(3) . . ? 
O2 C7 C8 119.0(4) . . ? 
O2 C7 C6 120.6(4) . . ? 
C8 C7 C6 120.3(3) . . ? 
C9 C8 C7 118.7(4) . . ? 
C9 C8 C24 127.0(4) . . ? 
C7 C8 C24 112.7(3) . . ? 
O3 C9 C8 126.6(4) . . ? 
O3 C9 C2 109.7(3) . . ? 
C8 C9 C2 123.7(3) . . ? 
O3 C10 H10A 109.5 . . ? 
O3 C10 H10B 109.5 . . ? 
H10A C10 H10B 109.5 . . ? 
O3 C10 H10C 109.5 . . ? 
H10A C10 H10C 109.5 . . ? 
H10B C10 H10C 109.5 . . ? 
C2 C11 H11A 109.5 . . ? 
C2 C11 H11B 109.5 . . ? 
H11A C11 H11B 109.5 . . ? 
C2 C11 H11C 109.5 . . ? 
H11A C11 H11C 109.5 . . ? 
H11B C11 H11C 109.5 . . ? 
C3 C12 H12A 109.5 . . ? 
C3 C12 H12B 109.5 . . ? 
H12A C12 H12B 109.5 . . ? 
C3 C12 H12C 109.5 . . ? 
H12A C12 H12C 109.5 . . ? 
H12B C12 H12C 109.5 . . ? 
C3 C13 H13A 109.5 . . ? 
C3 C13 H13B 109.5 . . ? 
H13A C13 H13B 109.5 . . ? 
C3 C13 H13C 109.5 . . ? 
H13A C13 H13C 109.5 . . ? 
H13B C13 H13C 109.5 . . ? 
C15A C14 C15 51.3(15) . . ? 
C15A C14 C4 100.7(13) . . ? 
C15 C14 C4 115.5(4) . . ? 
C15A C14 H14A 67.6 . . ? 
C15 C14 H14A 108.4 . . ? 
C4 C14 H14A 108.4 . . ? 
C15A C14 H14B 150.3 . . ? 
C15 C14 H14B 108.4 . . ? 
C4 C14 H14B 108.4 . . ? 
H14A C14 H14B 107.5 . . ? 
C15 C16 C15A 59.7(15) . . ? 
C15 C16 C17A 166.6(18) . . ? 
C15A C16 C17A 127(2) . . ? 
C15 C16 C17 125.9(6) . . ? 
C15A C16 C17 66.8(15) . . ? 
C17A C16 C17 63.7(18) . . ? 
C15 C16 C18 120.4(6) . . ? 
C15A C16 C18 171.9(16) . . ? 
C17A C16 C18 51.3(17) . . ? 
C17 C16 C18 113.7(5) . . ? 
C15 C16 C18A 54.9(14) . . ? 
C15A C16 C18A 114(2) . . ? 
C17A C16 C18A 119(2) . . ? 
C17 C16 C18A 164.7(14) . . ? 
C18 C16 C18A 67.7(14) . . ? 
C16 C15 C14 125.1(5) . . ? 
C16 C15 H15 117.5 . . ? 
C14 C15 H15 117.5 . . ? 
C16 C17 H17A 109.5 . . ? 
C16 C17 H17B 109.5 . . ? 
C16 C17 H17C 109.5 . . ? 
C16 C18 H18A 109.5 . . ? 
C16 C18 H18B 109.5 . . ? 
C16 C18 H18C 109.5 . . ? 
C16 C15A C14 123(3) . . ? 
C16 C15A H15A 118.3 . . ? 
C14 C15A H15A 118.3 . . ? 
C16 C17A H17D 109.5 . . ? 
C16 C17A H17E 109.5 . . ? 
H17D C17A H17E 109.5 . . ? 
C16 C17A H17F 109.5 . . ? 
H17D C17A H17F 109.5 . . ? 
H17E C17A H17F 109.5 . . ? 
C16 C18A H18D 109.5 . . ? 
C16 C18A H18E 109.5 . . ? 
H18D C18A H18E 109.5 . . ? 
C16 C18A H18F 109.5 . . ? 
H18D C18A H18F 109.5 . . ? 
H18E C18A H18F 109.5 . . ? 
C20 C19 C6 113.6(3) . . ? 
C20 C19 H19A 108.8 . . ? 
C6 C19 H19A 108.8 . . ? 
C20 C19 H19B 108.8 . . ? 
C6 C19 H19B 108.8 . . ? 
H19A C19 H19B 107.7 . . ? 
C21 C20 C19 128.1(4) . . ? 
C21 C20 H20 115.9 . . ? 
C19 C20 H20 115.9 . . ? 
C20 C21 C23 121.7(5) . . ? 
C20 C21 C22 123.0(5) . . ? 
C23 C21 C22 115.3(5) . . ? 
C21 C22 H22A 109.5 . . ? 
C21 C22 H22B 109.5 . . ? 
H22A C22 H22B 109.5 . . ? 
C21 C22 H22C 109.5 . . ? 
H22A C22 H22C 109.5 . . ? 
H22B C22 H22C 109.5 . . ? 
C21 C23 H23A 109.5 . . ? 
C21 C23 H23B 109.5 . . ? 
H23A C23 H23B 109.5 . . ? 
C21 C23 H23C 109.5 . . ? 
H23A C23 H23C 109.5 . . ? 
H23B C23 H23C 109.5 . . ? 
O4 C24 C25 121.8(4) . . ? 
O4 C24 C8 119.4(4) . . ? 
C25 C24 C8 118.8(4) . . ? 
C30 C25 C26 118.3(4) . . ? 
C30 C25 C24 123.0(4) . . ? 
C26 C25 C24 118.7(4) . . ? 
C27 C26 C25 119.4(5) . . ? 
C27 C26 H26 120.3 . . ? 
C25 C26 H26 120.3 . . ? 
C28 C27 C26 121.2(5) . . ? 
C28 C27 H27 119.4 . . ? 
C26 C27 H27 119.4 . . ? 
C27 C28 C29 119.9(5) . . ? 
C27 C28 H28 120.1 . . ? 
C29 C28 H28 120.1 . . ? 
C28 C29 C30 119.7(5) . . ? 
C28 C29 H29 120.2 . . ? 
C30 C29 H29 120.2 . . ? 
C25 C30 C29 121.6(5) . . ? 
C25 C30 H30 119.2 . . ? 
C29 C30 H30 119.2 . . ? 
 
loop_ 
 _geom_torsion_atom_site_label_1 
 _geom_torsion_atom_site_label_2 
 _geom_torsion_atom_site_label_3 
 _geom_torsion_atom_site_label_4 
 _geom_torsion 
 _geom_torsion_site_symmetry_1 
 _geom_torsion_site_symmetry_2 
 _geom_torsion_site_symmetry_3 
 _geom_torsion_site_symmetry_4 
 _geom_torsion_publ_flag 
O1 C1 C2 C9 126.6(4) . . . . ? 
C6 C1 C2 C9 -58.1(4) . . . . ? 
O1 C1 C2 C11 10.2(5) . . . . ? 
C6 C1 C2 C11 -174.5(3) . . . . ? 
O1 C1 C2 C3 -112.8(4) . . . . ? 
C6 C1 C2 C3 62.6(4) . . . . ? 
C1 C2 C3 C13 65.4(4) . . . . ? 
C9 C2 C3 C13 -178.6(3) . . . . ? 
C11 C2 C3 C13 -55.4(4) . . . . ? 
C1 C2 C3 C12 -177.9(4) . . . . ? 
C9 C2 C3 C12 -61.9(5) . . . . ? 
C11 C2 C3 C12 61.3(5) . . . . ? 
C1 C2 C3 C4 -52.6(4) . . . . ? 
C9 C2 C3 C4 63.4(4) . . . . ? 
C11 C2 C3 C4 -173.4(3) . . . . ? 
C13 C3 C4 C5 -71.6(4) . . . . ? 
C12 C3 C4 C5 171.1(4) . . . . ? 
C2 C3 C4 C5 46.4(5) . . . . ? 
C13 C3 C4 C14 155.4(4) . . . . ? 
C12 C3 C4 C14 38.2(5) . . . . ? 
C2 C3 C4 C14 -86.5(5) . . . . ? 
C14 C4 C5 C6 86.1(5) . . . . ? 
C3 C4 C5 C6 -48.2(5) . . . . ? 
O1 C1 C6 C7 -130.6(4) . . . . ? 
C2 C1 C6 C7 54.1(4) . . . . ? 
O1 C1 C6 C19 -7.0(6) . . . . ? 
C2 C1 C6 C19 177.6(3) . . . . ? 
O1 C1 C6 C5 113.9(4) . . . . ? 
C2 C1 C6 C5 -61.4(4) . . . . ? 
C4 C5 C6 C1 53.4(5) . . . . ? 
C4 C5 C6 C7 -63.5(5) . . . . ? 
C4 C5 C6 C19 176.4(4) . . . . ? 
C1 C6 C7 O2 165.5(4) . . . . ? 
C19 C6 C7 O2 40.4(5) . . . . ? 
C5 C6 C7 O2 -79.5(5) . . . . ? 
C1 C6 C7 C8 -16.4(5) . . . . ? 
C19 C6 C7 C8 -141.6(4) . . . . ? 
C5 C6 C7 C8 98.6(4) . . . . ? 
O2 C7 C8 C9 164.9(4) . . . . ? 
C6 C7 C8 C9 -13.3(6) . . . . ? 
O2 C7 C8 C24 -1.9(6) . . . . ? 
C6 C7 C8 C24 -180.0(4) . . . . ? 
C10 O3 C9 C8 -6.9(7) . . . . ? 
C10 O3 C9 C2 171.6(4) . . . . ? 
C7 C8 C9 O3 -174.3(4) . . . . ? 
C24 C8 C9 O3 -9.6(7) . . . . ? 
C7 C8 C9 C2 7.4(6) . . . . ? 
C24 C8 C9 C2 172.0(4) . . . . ? 
C1 C2 C9 O3 -152.3(3) . . . . ? 
C11 C2 C9 O3 -35.2(4) . . . . ? 
C3 C2 C9 O3 90.5(4) . . . . ? 
C1 C2 C9 C8 26.3(5) . . . . ? 
C11 C2 C9 C8 143.4(4) . . . . ? 
C3 C2 C9 C8 -90.9(5) . . . . ? 
C5 C4 C14 C15A 92.7(16) . . . . ? 
C3 C4 C14 C15A -135.7(16) . . . . ? 
C5 C4 C14 C15 40.6(5) . . . . ? 
C3 C4 C14 C15 172.2(4) . . . . ? 
C15A C16 C15 C14 -6.3(17) . . . . ? 
C17A C16 C15 C14 -129(8) . . . . ? 
C17 C16 C15 C14 3.8(10) . . . . ? 
C18 C16 C15 C14 -176.8(6) . . . . ? 
C18A C16 C15 C14 165.0(18) . . . . ? 
C15A C14 C15 C16 6.2(17) . . . . ? 
C4 C14 C15 C16 89.4(7) . . . . ? 
C15 C16 C15A C14 6.3(17) . . . . ? 
C17A C16 C15A C14 172(2) . . . . ? 
C17 C16 C15A C14 -165(3) . . . . ? 
C18 C16 C15A C14 99(11) . . . . ? 
C18A C16 C15A C14 -1(3) . . . . ? 
C15 C14 C15A C16 -5.9(16) . . . . ? 
C4 C14 C15A C16 -120(2) . . . . ? 
C1 C6 C19 C20 -71.7(5) . . . . ? 
C7 C6 C19 C20 51.2(5) . . . . ? 
C5 C6 C19 C20 169.5(4) . . . . ? 
C6 C19 C20 C21 -135.8(5) . . . . ? 
C19 C20 C21 C23 178.4(5) . . . . ? 
C19 C20 C21 C22 -2.1(8) . . . . ? 
C9 C8 C24 O4 -68.5(6) . . . . ? 
C7 C8 C24 O4 96.9(5) . . . . ? 
C9 C8 C24 C25 114.3(5) . . . . ? 
C7 C8 C24 C25 -80.3(5) . . . . ? 
O4 C24 C25 C30 180.0(5) . . . . ? 
C8 C24 C25 C30 -2.9(6) . . . . ? 
O4 C24 C25 C26 -1.4(7) . . . . ? 
C8 C24 C25 C26 175.7(4) . . . . ? 
C30 C25 C26 C27 -2.3(7) . . . . ? 
C24 C25 C26 C27 179.0(4) . . . . ? 
C25 C26 C27 C28 1.7(8) . . . . ? 
C26 C27 C28 C29 -0.4(9) . . . . ? 
C27 C28 C29 C30 -0.2(9) . . . . ? 
C26 C25 C30 C29 1.7(7) . . . . ? 
C24 C25 C30 C29 -179.7(5) . . . . ? 
C28 C29 C30 C25 -0.5(9) . . . . ? 
 
_diffrn_measured_fraction_theta_max    0.956 
_diffrn_reflns_theta_full              67.50 
_diffrn_measured_fraction_theta_full   0.955 
_refine_diff_density_max    0.341 
_refine_diff_density_min   -0.375 
_refine_diff_density_rms    0.079 
